# Supplementary material
Source: Springer Nature journal article supplement (https://www.springermedizin.de/resource/supplementary/12879_2010_1239_MOESM4_ESM.pdf/9442158)

percentage

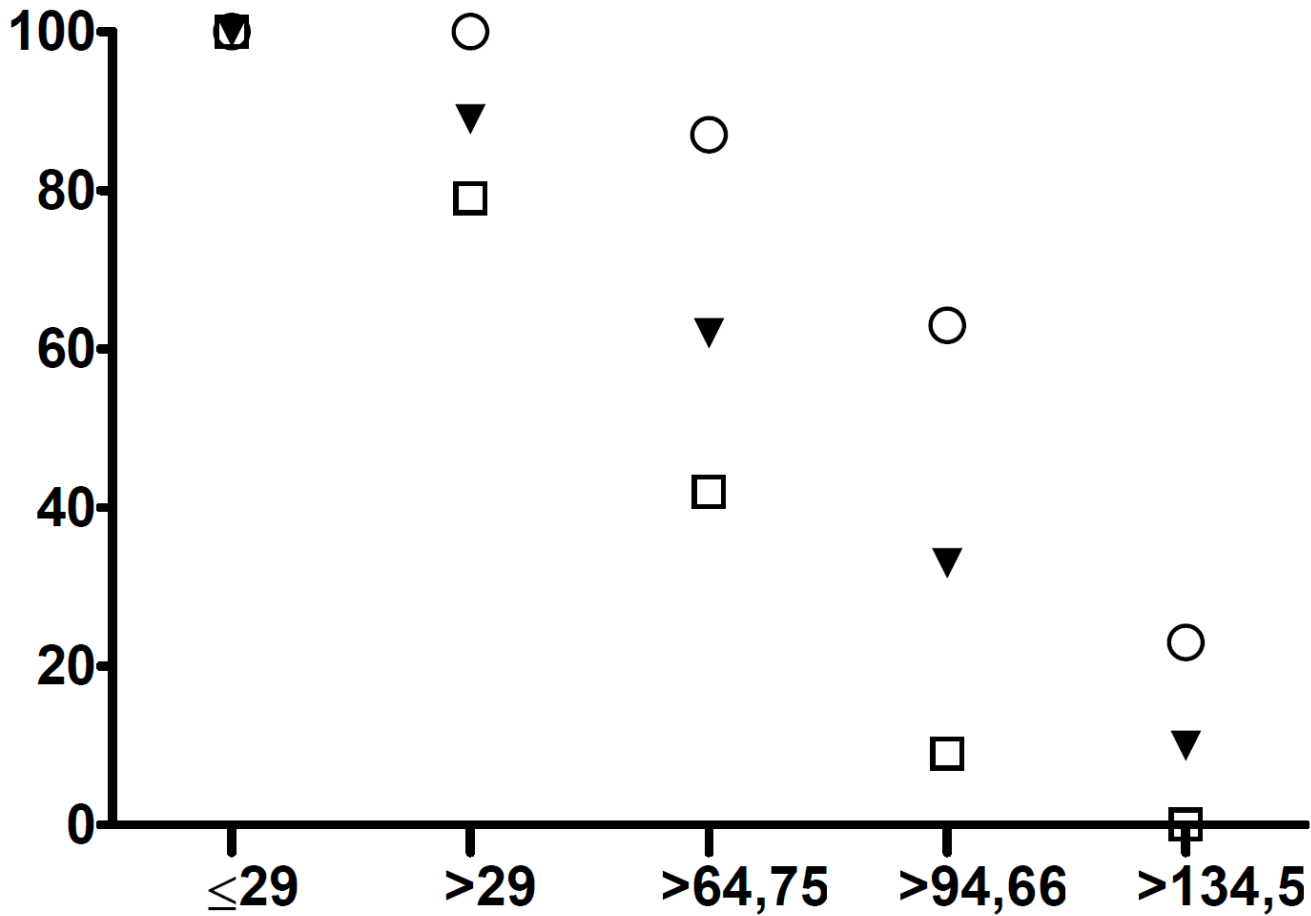

Cut off point of score prediction rule

Supplement: MOESM4 [file 9442158]
